# Supplementary material
Source: publisher figshare collection journal article supplement (https://frontiersin.figshare.com/ndownloader/files/17483243)
Supplement: Supplementary file 1 [file 17483243]

## *Supplementary Material*

### 1.1 Supplementary Figures

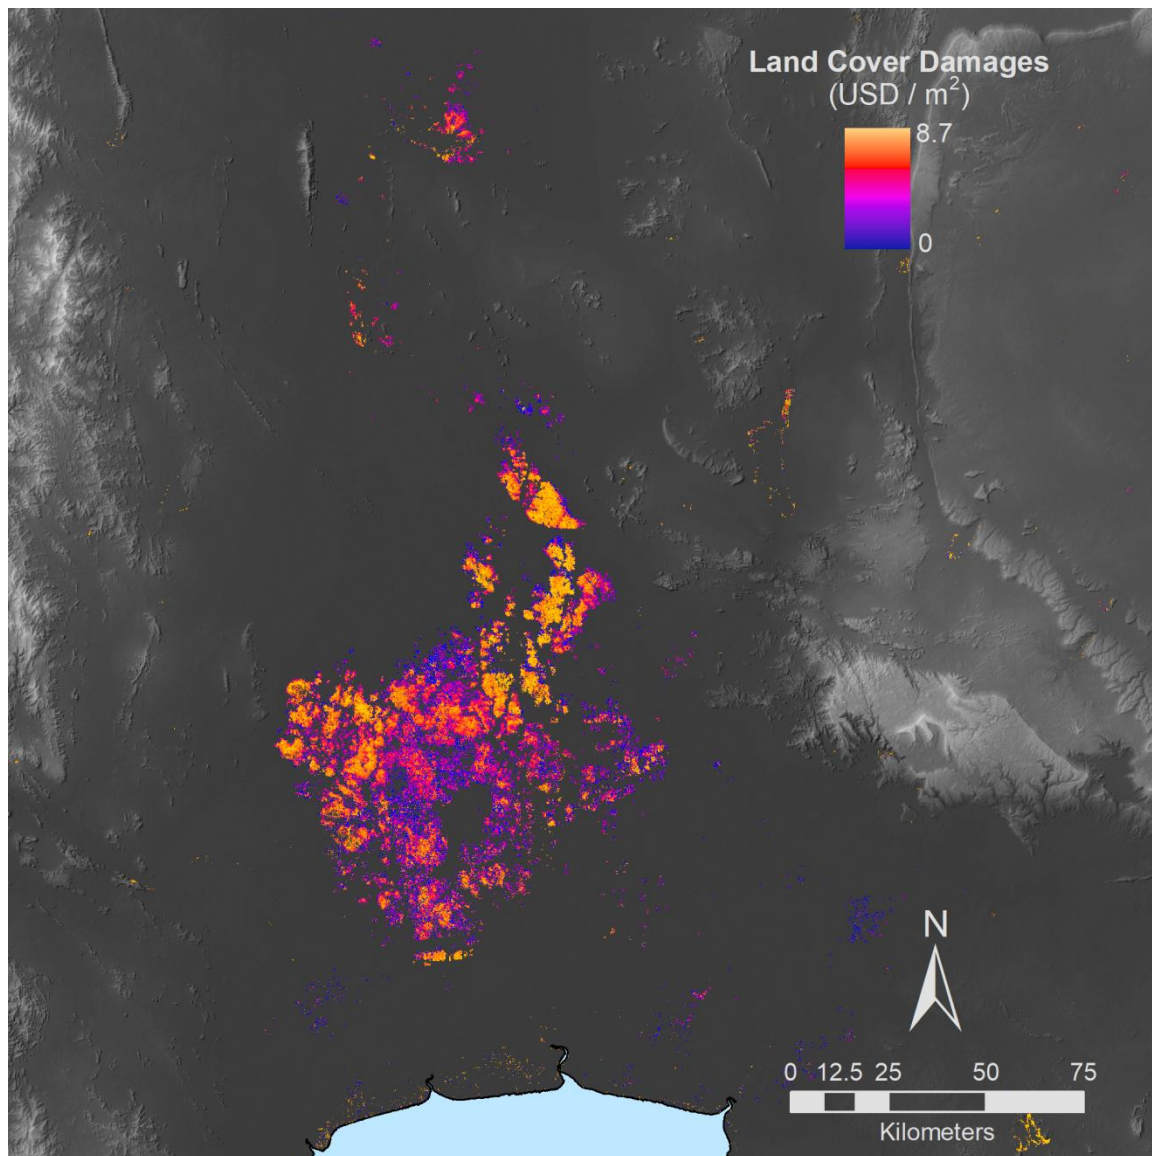

**Supplementary Figure 1.** Results of damage assessment for land cover categories. Color gradient represents severity of damages in USD/m<sup>2</sup>.

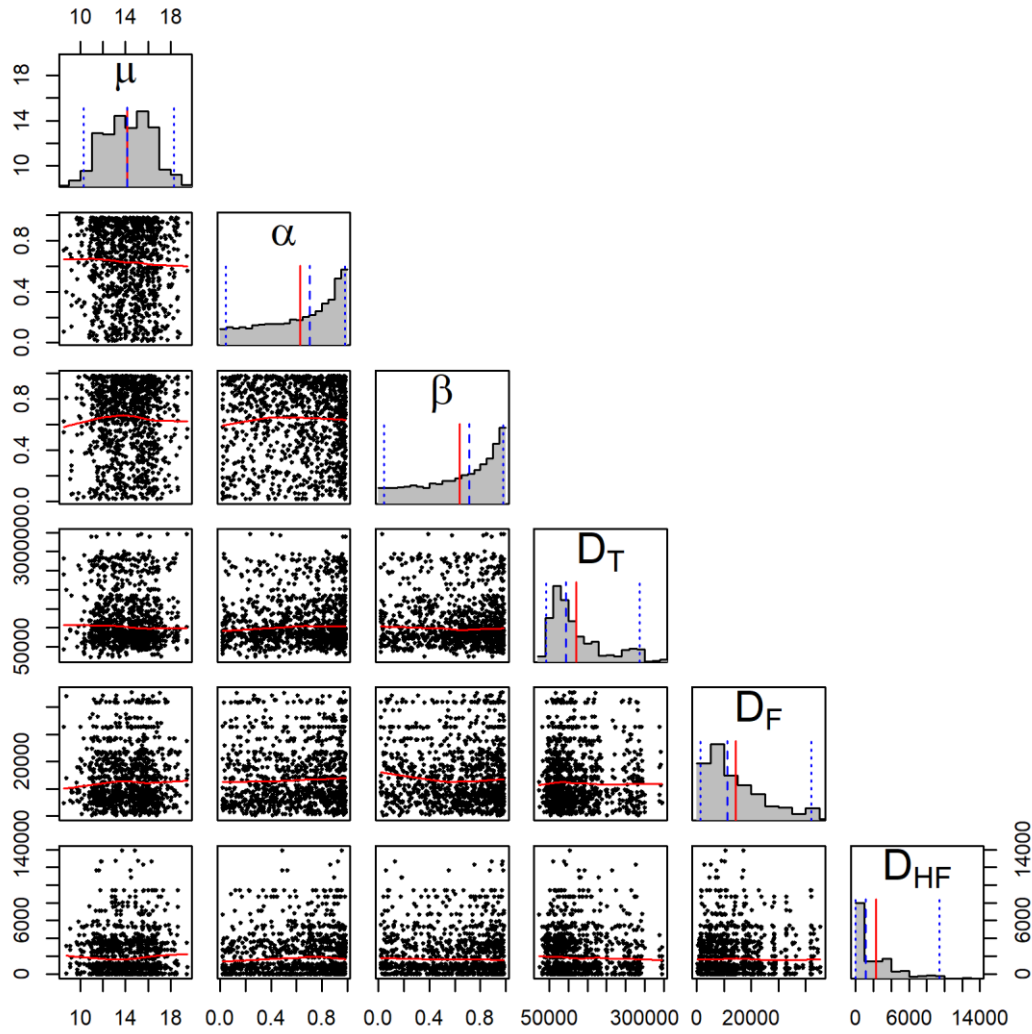

**Supplementary Figure 2.** Pairs plots and marginal distributions for the parameters used emergency vehicle routing model. Red lines in scatter plots show a loess regression through the points. Blue numbers indicate correlation coefficients between parameters. For marginal density distributions, dotted lines represent the 5<sup>th</sup> and 95<sup>th</sup> percentile, dashed blue line represents the median value, and the red solid line represents the mean.
